# Supplementary material
Source: PubMed Central journal article supplement (PMC3666674)
Supplement: 1221833110_sd04.pdf [file 1221833110_sd04.pdf]

VWamide\_Lymnaea stagnalis  
 Helio119288765-198\_Helobdella\_robusta  
 fgenes1\_pg\_C\_scaffold\_37000004\_Capitella\_teleta  
 NP\_001191611\_Aplysia\_californica  
 AFS33094\_Platynereis\_dumerilli  
 e\_gw1.144.57.1\_Capitella\_teleta  
 B4N5C5\_DROWI\_Drosophila\_willistoni  
 NP\_001137202\_Tribolium\_castaneum  
 EHJ68077\_Danaus\_plexippus  
 XP\_001949765\_Acyrthosiphon\_pisum  
 XP\_001626456\_Nematostella\_vectensis  
 LWamide\_HYDEC\_Hydractinia\_echinata

10 20 30 40 50 60 70 80 90

A I T D S T E L S Q N T . . . . . F G N V H . . . . . S D L A K E P G A Y I H T F R D F D D A T O E T D T S L R G T O N . . . . . W S E L S K W V K G D  
 S I N - D L I - . . . . . R R R R N . . . . . V A E V A S L K S L D G G - D D - D D Y S . . . . . S S V R D D V . . . . . W G K R  
 K W G - G S N - . . . . . T M - . . . . . R T . . . . . W G R A D D N E E D E L A K R K W G S N M R V W G K - R A - D - D N K R W G S N S M R V W G K R A D D M - . . . . . D E S K R G W K N N N  
 R W K - Q M A S W G K R L D D S D R D K K W K M S V W G K R E . . . . . D N G E P L D K K W K M S W G K - R D - T - L D P R K R W K M A V W G R O G L D R N D K R W K M A T W - . . . . .  
 G W G - K R G A L D P E L E S E A D K R R G - . . . . . W G K R S - . . . . . S L E E M E K R R G W G K - R T S V E . . . . . E E K R R G W . . . . .  
 K R S - D S E M D K R R G - . . . . . W G K R S - . . . . . F D E D S E E V A K R R G W G K - R S - E A I N L D E V E E S I A E . . . . . M D K R R G W . . . . .  
 A W G - S L D - . . . . . S S - . . . . . W G K R S - . . . . . N A G D V V G G F A - G G - D D I Y M T G H F V P - . . . . . L I V T D G S - . . . . .  
 D W N K D L H I - . . . . . - . . . . . W G K R G - . . . . . W N N L H E W G R - . . . . . - . . . . . K R S V P A W - . . . . .  
 G W G - D L N - . . . . . T A - . . . . . W G K R A - . . . . . W R O L S O T P W G K - R G W O D L N S A W G K R G W - . . . . . Q D M S S A W - . . . . .  
 G W O - N L K - . . . . . T T - . . . . . W G K R A - . . . . . Q D W N L H S W G K - R O - . . . . . G W - . . . . . Q K L H G S W - . . . . .  
 L W G - K R Q A G A P G L - . . . . . W G K R E - . . . . . A G A P G L W G R - E A - N A P L W G K R R - . . . . . A G A P G L W - . . . . .  
 L W G - R D A - K P P G L - . . . . . W G R D A - . . . . . K P P L W G R - D A - K P P L W G R D A K P P G L W G D - . . . . . A K P P L W - . . . . .

110 120 130 140 150 160 170 180 190 200

S Y P E S D N Q S S E N N S Q N K R W N A F S - . . . . . S W G K R S A - . . . . . E D E N S S G L D E - . . . . . O K R W - . . . . . K Q M A V - . . . . . W G K R  
 H e l i o 1 1 9 2 8 8 7 6 5 - 1 9 8 \_ H e l o b d e l l a \_ r o b u s t a  
 f g e n e s 1 \_ p g \_ C \_ s c a f f o l d \_ 3 7 0 0 0 0 0 4 \_ C a p i t e l l a \_ t e l e t a  
 M R V W G K R - A D D E I D E D K R K W S N S - M - N V W G K R S G - D E F S D V N - . . . . . K R O W G T - . . . . . R S M A V - . . . . . W G K R  
 N P \_ 0 0 1 1 9 1 6 1 1 \_ A p l y s i a \_ c a l i f o r n i c a  
 . . . . . G K R - . . . . . N S S E N Y D K R W K M S - V - . . . . . W G K R D G - . . . . . D G D L D K R W K M S V W G K R D G D D L - . . . . . D K R W - . . . . . K M S V - . . . . . W G K R  
 A F S 3 3 0 9 4 \_ P l a t y n e r e i s \_ d u m e r i l l i  
 . . . . . G K R - . . . . . D F E E E E - E M D K R R G W K R S L - . . . . . E E A E E K - . . . . . R R W G K - R L T I D A L E D G I D K R G W G K R  
 e \_ g w 1 . 1 4 4 . 5 7 . 1 \_ C a p i t e l l a \_ t e l e t a  
 . . . . . - . . . . . N T I D W K T F E R M - . . . . . A N O Q O O G D O V A E O P O S D E E P D E I G D V E A A S N L L D - . . . . . K R A W - . . . . . K M N N V A - . . . . . W G K R  
 B 4 N 5 C 5 \_ D R O W I \_ D r o s o p h i l a \_ w i l l i s t o n i  
 . . . . . E E Q - . . . . . Q E K P A W S Q L O - . . . . . S G W G K R F A - . . . . . P E D E V A I R O L A A M L D S O Y D D Y N P E I E T N D D E K R N V - . . . . . G O F H G G - . . . . . W G K R  
 N P \_ 0 0 1 1 3 7 2 0 2 \_ T r i b o l i u m \_ c a s t a n e u m  
 . . . . . G K R - . . . . . A P E K W S N F H - . . . . . S S W G K R S G - . . . . . P E P D Y E D Y E V V Y E H L M P S O L D G D M I E S P E - . . . . . K K A W - . . . . . S S L H S A - . . . . . W G K R  
 E H J 6 8 0 7 7 \_ D a n a u s \_ p l e x i p p u s  
 . . . . . G K R - . . . . . G W K D M O - S - . . . . . G W G K R F K - . . . . . D P A S S Q L S Q F D E V L D K Y E E E N P N E A - . . . . . K R S W - . . . . . D N F Q G S - . . . . . W G K R  
 X P \_ 0 0 1 9 4 9 7 6 5 \_ A c y r t h o s i p h o n \_ p i s u m  
 . . . . . G K R - . . . . . E A N A P L W G K R Q - A G P P L W G K R E A - . . . . . N A P G L W G K R Q A G P - . . . . . P G L W G K R E - . . . . . A N A P G L - . . . . . W G K R  
 X P \_ 0 0 1 6 2 6 4 5 6 \_ N e m a t o s t e l l a \_ v e c t e n s i s  
 . . . . . G R D - . . . . . A K P P G L W G R D A - . . . . . K P P L W G R D A K - . . . . . P P G L W G R D A K P - . . . . . P G L W G R - D - . . . . . A N A P G L - . . . . . W G R  
 L W A \_ H Y D E C \_ H y d r a c t i n i a \_ e c h i n a t a

Trimmed multiple sequence alignment of cnidarian, lophotrochozoan and arthropod LWamide, GWamide and MIP proneuropeptides.

XP\_001636257.1\_Nematostella\_vectensis  
 NP\_001103719\_Strongylocentrotus\_purpuratus  
 bursicon\_B2\_Tetranynchus\_urticae  
 Bursicon-beta\_Nasonia\_vitripennis  
 Bur-beta\_Tribolium\_castaneum  
 Bursicon-beta\_Daphnia\_pulex  
 bursicon\_A\_Tetranynchus\_urticae  
 XP\_002407512\_Ixodes\_scapularis  
 Bursicon-alpha\_Daphnia\_pulex  
 AD193040\_Procambius\_clearki  
 P\_650983\_Drosophila\_melanogaster  
 AB020870\_bursicon\_alpha\_Musca\_domestica  
 Bursicon-alpha\_Nasonia\_vitripennis  
 Bur-alpha\_Tribolium\_castaneum

10 20 30 40 50 60 70 80 90

O C K L S G Y T M E V I V H S - . . . . . C O P R K I S V N T - . . . . . V G I G V S S A L P A A G - L R I E P A T C C O O E I E S H E V E V G L W C Q A S P N S A W - . . . . . T O E Y H V  
 A D L R K L G - L O Y K L A R P - . . . . . G C R P V I L D S V G - . . . . . R R K S Y T R L M P N N L E V R S - . . . . . D R E E K G V V R K S - . . . . . P F R D V T  
 E N C A I L P G S I H V I K E E L D V A G N V I R S G E G D F L V N K - . . . . . E G I T V S L O P S V V H S S G F L K K N C O R E S R M K T R S I R L N H O F D P D G K K M T G E K - G S M E I E  
 E N D E K L D S E I R I I K E Y S E T G K L F R T C S D E I Q V S K E E G Y D S V O P S I V T T G F T K E S C O R E E F L E R T Y L N N O Y D S N G K Q F S L L D N S N M A I K  
 I T C E T L M S D I N L I K E E F D E L G R L Q R C N G E V A V N K E S C K S O V P S V I P T G F L K E Y C O R S F L R E R T I T L H O Y D P D G R L T A E I V N S M D V K  
 G T C E T L P S T I H I I K E E Y T D G G I L S R T E G D I G V A K E E - . . . . . Q V O V I V V H S S G F L K E O M C R S F L R R V V T L T H O Y D A N G N R L T G K S - S S L D V K  
 K G C H L R P - V I H V L S H P - . . . . . G C L S K P I P S F A - . . . . . H G C S S S Y V O V S G S K F W O V E R S O M C O E M G E R E A T V G I F C P K K T P - . . . . . K F R K I A  
 E S C O L R P - V I H V L K O P - . . . . . G C O P K P I P S F A - . . . . . Q O G S S S Y V O V S G S R Y W O V E R S O M C O E M G E R E A T K A V F C P K P G - G P - . . . . . F R K R I I  
 D E C O L T P - V I H V L O Y P - . . . . . G C I P K P I P S F A - . . . . . T K C R K S Y V O V S G S K L W O T E R S O M C O E S G E R E A T V S L L C P K A A P G E P - . . . . . K L R R V V  
 D E S L T P - V I H I L S Y Q - . . . . . G O T S K P I P S F A - . . . . . V Y O V S G S K L W O T E R S O M C O E S G E R E A S V I L N C P A R K G E P - . . . . . K O K K I L  
 D D C Q V T P - V I H V L O Y P - . . . . . G C V P K P I P S F A - . . . . . V G R O A S Y I O V S G S K I W O M E R S O M C O E S G E R E A A V S L F C P K V K P G E R - . . . . . K F K V L  
 D D C Q V T P - V I H V L O Y P - . . . . . G C V P K P I P S F A - . . . . . V G R O A S Y I O V S G S K I W O M E R S O M C O E S G E R E A A V S L F C P K V K H G E R - . . . . . K F K V L  
 D E C E V T P - V I H V L O Y T - . . . . . G C V P K P I P S F A - . . . . . K R C S S Y I O V S G S K I W O M E R S O M C O E S G E R E A S V S L F C P K T K A G D R - . . . . . F R K V I  
 D E C Q V T P - V I H V L O Y P - . . . . . G C V P K P I P S F A - . . . . . I R C A S Y I O V S G S K I W O M E R S O M C O E S G E R E A S V S L F C P K A K P G E R - . . . . . K F I K V T

100 110 120 130 140

I K T A T K A S A P P - . . . . . L E D L R L G - . . . . .  
 Y R I R R S R P R S V A S V S R V O T - . . . . .  
 M E E P E S D H L K S P - . . . . .  
 I R E P T N D K I K G F L - . . . . .  
 L R E P A E K Q Y K G D F S R - . . . . .  
 M R E A P D M R P R G S G A E - . . . . .  
 T K A P V D M O R P S T G I D D L T I K P Q E L I N L T E E L R K T D O D G S S - . . . . .  
 T R A P V E D M O R P S T A P D E A S I L P O E F V G L - . . . . .  
 T R A P V D M O R P S T A L E E S A V M P O E I A R F L D D G S P F K L - . . . . .  
 D E A P L D M O R P S T O V E E G T V L A G E I A N F I A R F M G W N P F L K - . . . . .  
 T K A P L E D M O R P S T S I E E S G I I P O E I A G Y S D E G P L N N H F R R I A L Q - . . . . .  
 T K A P L E D M O R P S T S I E E S G I V P O E I A G Y S D E G P P N N H F R I A L Q - . . . . .  
 T K A P L D M O R P S T S I E E R I V I P O E I A G L S N N G P L S N S A H F R N T F K L T - . . . . .  
 T K A L E D M O R P S T G V E E S A V I P O E I A G Y A D E G P L S N H F L K S H S O - . . . . .

Trimmed multiple sequence alignment of Nematostella vectensis and Strongylocentrotus purpuratus glycoprotein hormones with arthropod bursicons.

Pyrokinin(GLEAN\_04636)\_Tribolium\_castaneum F W F G P R L R G R K K  
 BAE94185\_Orgyia\_thyellina L W F G P R L G K R S  
 XP\_307885\_Anopheles\_gambiae\_str.\_PEST M W F G P R L G K R T  
 EG164203\_Acromyrmex\_echinator S Q F T P R L G R G S  
 XP\_003439981\_Oreochromis\_niloticus F L Y R P R N G R R S  
 BAL42621\_Cyprinus\_carpio F L Y R P R N G R R S  
 CAD29883\_Litoria\_caerulea F L F R P R N G R R S  
 XP\_854097\_Canis\_lupus\_familiaris F L F R P R N G R R S  
 XP\_003354764\_Sus\_scrofa F L F R P R N G R N L  
 XP\_001085777\_Macaca\_mulatta F L F R P R N G R R S  
 AAV74390\_Bombina\_maxima F L F R P R N G R K V

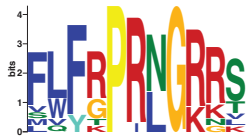

Shared motif in deuterostome neuromedin-U and protostome PBAN/pyrokinin families.

10

|                                         |   |   |   |   |   |   |   |   |   |   |   |   |   |   |   |
|-----------------------------------------|---|---|---|---|---|---|---|---|---|---|---|---|---|---|---|
| XP_002000913_Drosophila_mojavensis      | F | D | D | Y | G | H | M | R | F | G | K | R | G | N | D |
| XP_001846221_Culex_quinquefasciatus     | F | D | D | Y | G | H | M | R | F | G | K | R | G | G | E |
| XP_001378995_Monodelphis_domestica      | R | D | Y | M | G | W | M | D | F | G | R | R | S | A | E |
| EDL09153_Mus_musculus                   | R | D | Y | M | G | W | M | D | F | G | R | R | S | A | E |
| XP_002424661_Pediculus_humanus_corporis | F | D | D | Y | G | H | M | R | F | G | K | R | G | E | D |
| NP_001132994_Salmo_salar                | R | D | Y | N | G | W | M | D | F | G | R | R | S | A | E |
| CAB96790_Squalus_acanthias              | R | D | Y | T | G | W | M | D | F | G | R | R | S | I | E |
| EFN67877_Camponotus_floridanus          | L | D | D | Y | G | H | M | R | F | G | K | R | S | N | N |
| ACS45388_Rhodnius_prolixus              | F | N | E | Y | G | H | M | R | F | G | K | R | G | G | S |
| Sulfakinin_Dappu1:242979                | P | D | D | Y | G | H | M | R | Y | G | K | R | D | F | D |
| NP_990731_Gallus_gallus                 | H | F | Y | P | D | W | M | D | F | G | R | R | S | T | E |
| XP_003199491_Danio_rerio                | S | D | Y | Q | G | W | V | D | F | G | R | R | S | S | N |

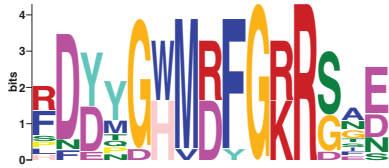

Shared motif in deuterostome cholecystokinin and protostome sulfakinin families.

|                                         |   |   |   |   |   |   |   |   |   |   |   |
|-----------------------------------------|---|---|---|---|---|---|---|---|---|---|---|
| AAU93565_Epinephelus_coioides           | K | N | F | F | W | K | T | F | T | S | C |
| XP_002430075_Pediculus_humanus_corporis | K | R | S | Y | W | K | Q | C | A | F | N |
| XP_003274336_Nomascus_leucogenys        | R | N | F | F | W | K | T | F | S | S | C |
| XP_001810067_Tribolium_castaneum        | G | R | V | Y | W | R | C | Y | F | N | A |
| XP_002074304_Drosophila_willistoni      | G | R | M | Y | W | R | C | Y | F | N | A |
| EGl60677_Acromyrmex_echinatior          | K | R | N | F | W | R | Q | C | S | L | N |
| XP_003244027_Acyrtosiphon_pisum         | G | R | L | Y | W | R | C | Y | F | N | A |
| Allatostatin_Dappu1:237118              | Q | R | V | F | W | R | C | Y | F | N | A |
| XP_002433459_Ixodes_scapularis          | K | R | S | G | W | K | Q | C | S | F | N |
| CAG07675_Tetraodon_nigroviridis         | R | I | F | F | W | K | S | W | T | S | C |
| XP_001490614_Equus_caballus             | K | N | F | F | W | K | T | F | S | S | C |
| XP_001333082_Danio_rerio                | R | N | F | Y | W | K | T | F | T | S | C |

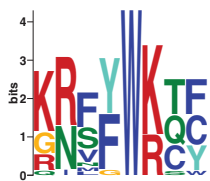

Shared motif in deuterostome somatostatin and protostome allatostatin-C families.

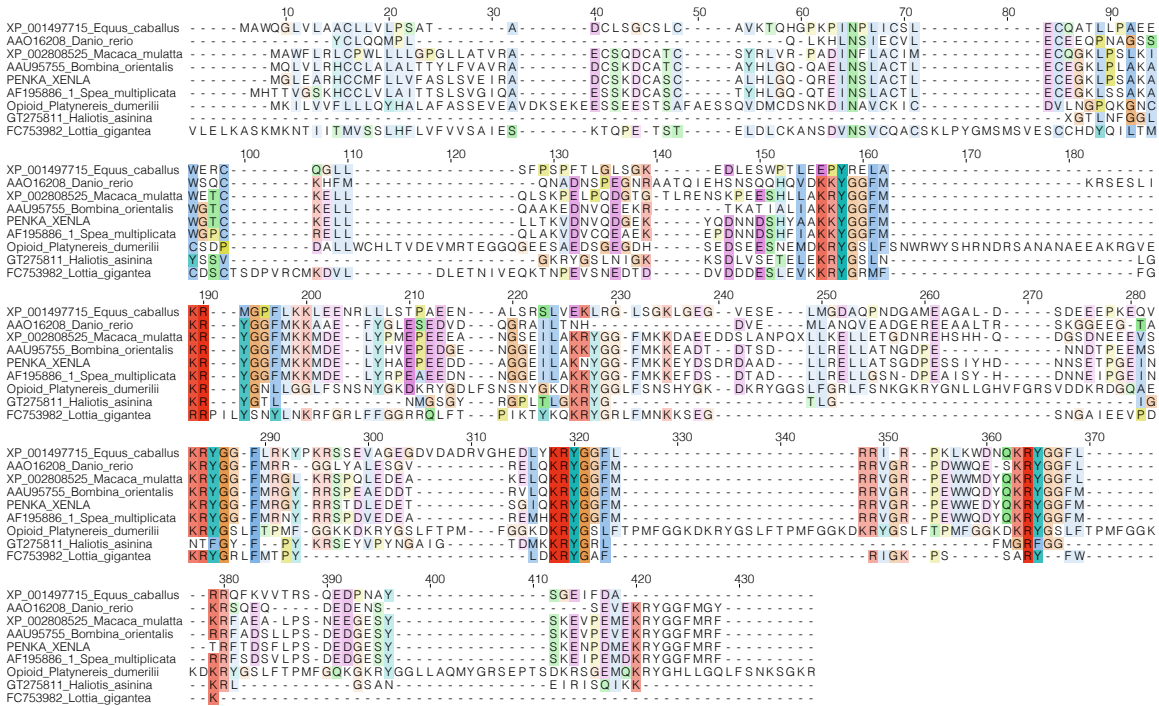

Multiple sequence alignment of proctostome and deuterostome opioid proneuropeptides.

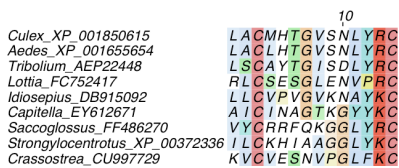

Trimmed multiple sequence alignment of the C-terminal Cys-containing peptide in luqin precursors of protostomes and deuterostomes.

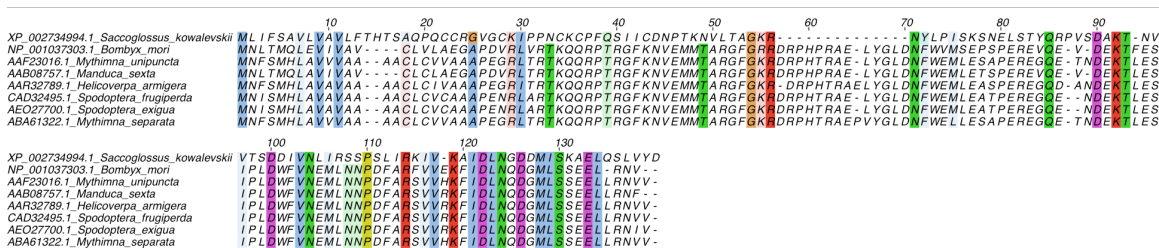

Multiple sequence alignment of insect and *Saccoglossus kowalevskii* allatotropin precursors.

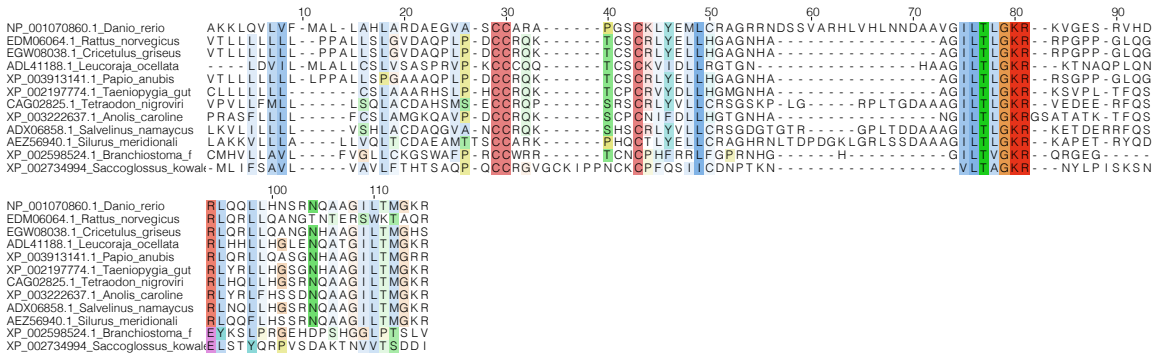

Multiple sequence alignment of *Saccoglossus kowalevskii* allatotropin and chordate orexin proneuropeptides.

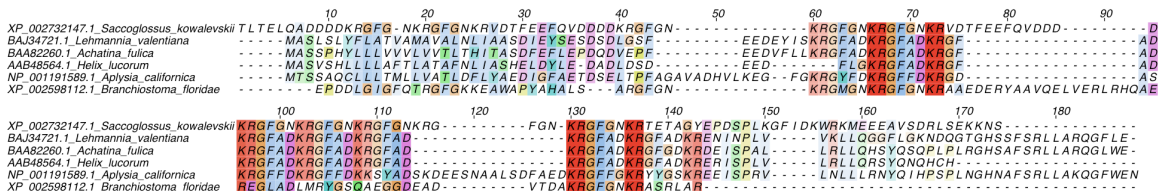

Trimmed multiple sequence alignment of protostome and deuterostome achatin proneuropeptides.

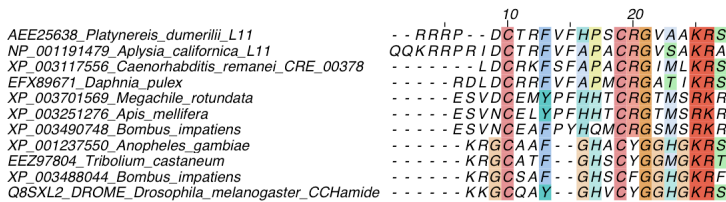

Trimmed multiple sequence alignment of protostome L11 and CCHamide/polychaete excitatory peptide neuropeptides.

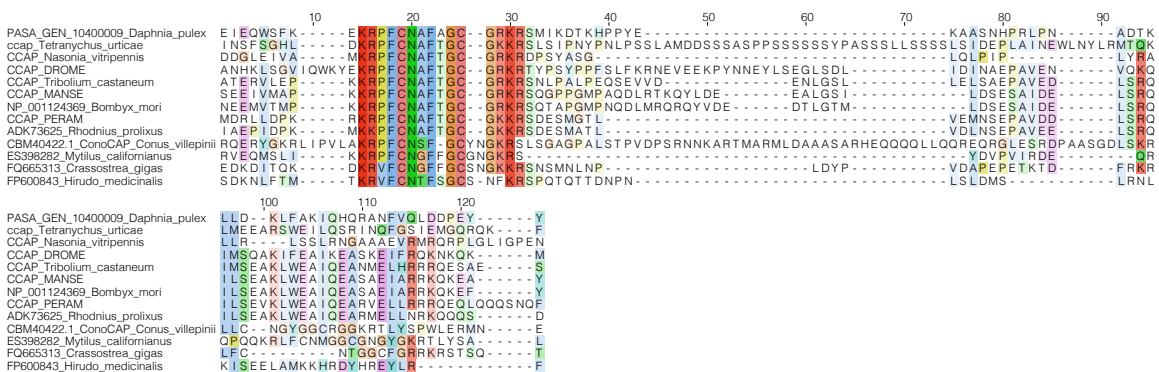

Trimmed multiple sequence alignment of CCAP/ConoCAP proneuropeptides from arthropods, mollusks and annelids.

10

XP\_003125675\_Sus\_scrofa  
 XP\_003479659\_Cavia\_porcellus  
 XP\_003419729\_Loxodonta\_africana  
 XP\_002929798\_Ailurogaster\_melanoleuca  
 XP\_002756762\_Callithrix\_jacchus  
 XP\_003208285\_Meleagris\_gallopavo  
 CBM40422.1\_Conus\_villepinii  
 NP\_001124369\_Bombyx\_mori  
 FP600843.1\_Hirudo\_medicinalis

KRSFRNGVGTGMKKT  
 KRSFRNGVGTGMKKT  
 KRSFRNGVGTGMKKT  
 KRSFRNGVGTGMKKT  
 KRSFRNGVGTGMKKT  
 KRSFRNGVGTGMKKT  
 KRVCNGFTGCGRRH  
 KRPFCAFTGCGRKR  
 KRVCNTFSGCSNFK

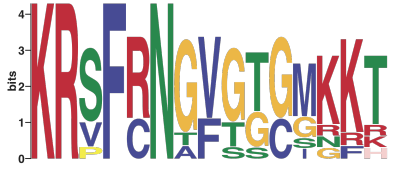

Shared motif in deuterostome neuropeptide-S and protostome CCAP families.

XP\_001654286\_Aedes\_aegypti  
 XP\_003244660\_Acyrthosiphon\_pisum  
 NP\_001124363\_Bombyx\_mori  
 EHJ7323\_Danaus\_plexippus  
 EV289917\_Tritonia\_diomedea  
 FR764292\_Malacoceros\_fulginosus  
 FO180226\_Sepia\_officinalis  
 FC738949\_Lottia\_gigantea  
 EB316616\_Aplysia\_californica  
 NP\_741126.1\_Caenorhabditis\_elegans  
 estExt\_Iggenes1\_pg\_C\_360058\_Capitella\_teteta

SAKDFFICLSNQLGDPDTLNÁ-----MLLDNLEVAÇDPRFSPVSAIQKRNSKYVSKOKFYISWGGKRN-----SDKHGRP-----K  
 ROKTVFSSWGGKR-----RSSDFPWGGKRFITGDAK-----QSTYFYGGKRAFSSWGGKRA-----GOMVYKPGSKSSKLIFSATVPELT  
 YDKNFSWGGKRDKPSFEH-----OMWTWK-----RSSVREPSMPKRVRFSPWGGKRS-----GOMIYKPKGSKSVIFSASVPELT  
 LEKRFSWGGKRNRPNTIE-----KSAGIREPSMPKRVRFSPWGGKRS-----GOMIYKPKGSKSVIFSASVPELT  
 EKRSFAAWAGKRSADYDHP-----VYGSVMVKRPSFAWAGKRS-----LSPDWD  
 AFRKRVQFWGGKRSVGFDEIDDSSEVALDKRNWFERSEPRDYAALMKKGFQWGGKRASSWGGKRS-----SLSALSNDTLDTDSYISDELDNK  
 EEKRKFSWGGKRGGPVLPSS-----YIIRTRTNSKPDVITHKSRFSWGGKRS-----AAGISDPELSDN-----LLE  
 GKRAAFTSWGGKRSNDEYDLDKKAFRYWNGKPSDL-----NDGGDGNVMDKKAAFTSWGGKRSDFGDEM-----DKK  
 GEGTNIIPENERDEVFDP-----DSGTEDLDRAGFAFWAGKRD-----GDGVV-----DKR  
 -----EYSDAKR-----AASSEGMR-----NKR  
 IDKRAFSAWGGKRG-----FHWGGKRSEDNE-----MDKRAFSAWGGKRA-FNPWGGKRS-FEDEAERGNFE-----EOK

XP\_001654286\_Aedes\_aegypti  
 XP\_003244660\_Acyrthosiphon\_pisum  
 NP\_001124363\_Bombyx\_mori  
 EHJ7323\_Danaus\_plexippus  
 EV289917\_Tritonia\_diomedea  
 FR764292\_Malacoceros\_fulginosus  
 FO180226\_Sepia\_officinalis  
 FC738949\_Lottia\_gigantea  
 EB316616\_Aplysia\_californica  
 NP\_741126.1\_Caenorhabditis\_elegans  
 estExt\_Iggenes1\_pg\_C\_360058\_Capitella\_teteta

NVFPW-----GGKRN-----TGRVHROPKVV-----  
 OTFSSW-----GGKRS-----DYDGYDNGEMDEHOMDKRELNGIKODKNYRNKMTKG IHALFTIFSDWSRDPPEEKKGIRYAGIKSM-----  
 KIVSNY-----LPSGERL-----NLAGLHYIPSVDKRFP LKMMALSAKFPDRSFKAMPFTFVESLPKVPKPGQPYD-----  
 RIVSNL-----SPNGNRL-----NMAGLQFIPSPDKRHP I K I LALNTKLDERTLRDALPNTFMETIPKMYKPGHAYLD-----  
 RVLNLF-----GGKRA-----P-----FNPWGGKR-----AFSOWG-----GKRFSFPWGGKR-----AFSP  
 RLLLOWTDSDI GR LQK-----  
 SAFTSW-----GGKRSYDGDVOKKAAFTSWGGKR-----SLYDLGLYDLNKRPAFSSWGGKRS LFPFHLSDNIPDPFNEFNFLLLTKRKPWFNFAKN  
 PAFHAW-----SGKRT-----  
 KOFYAW-----AGKRS-----SAPVHYFEDSIAQEAAGPSM-----  
 ROFGPW-----GGKRA-----SPEIYKKAFFNPWGGKRSSSTSSLEDF-----

XP\_001654286\_Aedes\_aegypti  
 XP\_003244660\_Acyrthosiphon\_pisum  
 NP\_001124363\_Bombyx\_mori  
 EHJ7323\_Danaus\_plexippus  
 EV289917\_Tritonia\_diomedea  
 FR764292\_Malacoceros\_fulginosus  
 FO180226\_Sepia\_officinalis  
 FC738949\_Lottia\_gigantea  
 EB316616\_Aplysia\_californica  
 NP\_741126.1\_Caenorhabditis\_elegans  
 estExt\_Iggenes1\_pg\_C\_360058\_Capitella\_teteta

-----IRNPFHAWGGKRNQKDDN  
 -----RSSDFPWGGKRFITGDAK  
 -----VNIKKDKRREVKS AWGGKRSPP IIG  
 -----VHLKKDKGRKVKFS AWGGKRSPP IIG  
 -----INE LRKVRHVMG  
 -----W-----GGKRAFSPWGGKRAFQFWG  
 -----LLEKRGFNFWA  
 YLRAFVTRLLNERAPKRSFS AWKGRNGELVY  
 -----PHSAVDAOKRPAFAWAGKRSSTYPYK  
 -----EKIKDQYAWAGK  
 -----LSKRSFNPWGGKRS S DMGK

Trimmed multiple sequence alignment of leucokinin from arthropods, nematodes, annelids and mollusks.

ACI90289\_Apis\_mellifera  
 NP\_001156174\_Acyrthosiphon\_pisum  
 NP\_001166882\_Bombyx\_mori  
 ACT98134\_Rhodnius\_prolixus  
 BAG68789\_Procambarus\_clarkii  
 Helro1|167674\_Helobdella\_robusta  
 ABA70768\_Aplysia\_californica  
 jgil|Capca|226517\_Capitella\_teteta

KRQDVDHVF LRFGR  
 KRQDLHVF LRFGR  
 KRQDVHVSFLRFGR  
 KRQDIDHVFMRFGRR  
 KRQDLHVF LRFGRS  
 LNDKKA VNNMLRMGKR  
 LRLGRGLQMLRLGKR  
 EQQKRAMSMLRMGKR

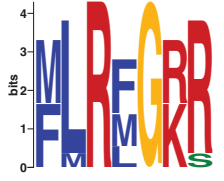

Shared motif in arthropod myosuppressin and lophotrochozoan myomodulin families.
